# Supplementary material for: Identifying the Factors Related to Depressive Symptoms Amongst Community-Dwelling Older Adults with Mild Cognitive Impairment
Source: MDPI journal article supplement (doi:10.3390/ijerph16183449), 2019-09-17
Supplement: s1 [file s1]

**Supplementary Table 1.** Logistic regression analysis for the correlates of the depressive symptoms in patients with MCI (*N* = 154).

| Variable                                | OR    | 95% CI      | P value |
|-----------------------------------------|-------|-------------|---------|
| Social network                          | 0.804 | 0.667–0.970 | 0.022   |
| MOS-SSS-C (positive social interaction) | 0.956 | 0.919–0.994 | 0.024   |
| MIC                                     | 1.134 | 1.006–1.278 | 0.40    |
| FAQ                                     | 1.721 | 1.116–2.654 | 0.014   |
| EQ-VAS                                  | 0.946 | 0.904–0.991 | 0.018   |

Note: OR = odds ratio, 95% CI = 95% Confidential Interval, MOS-SSS-C, Chinese version of Medical Outcomes Study Social Support Survey, MIC = Memory Inventory for Chinese, EQ-VAS = EuroQol-visual Analogue Scale, FAQ = Functional Activities Questionnaire.
